# Supplementary material
Source: PubMed Central journal article supplement (PMC6413260)
Supplement: ajtr0011-0964-f6.pdf [file ajtr0011-0964-f6.pdf]

BNP mitigates podocyte ECM accumulation via GSK3 $\beta$  inhibition

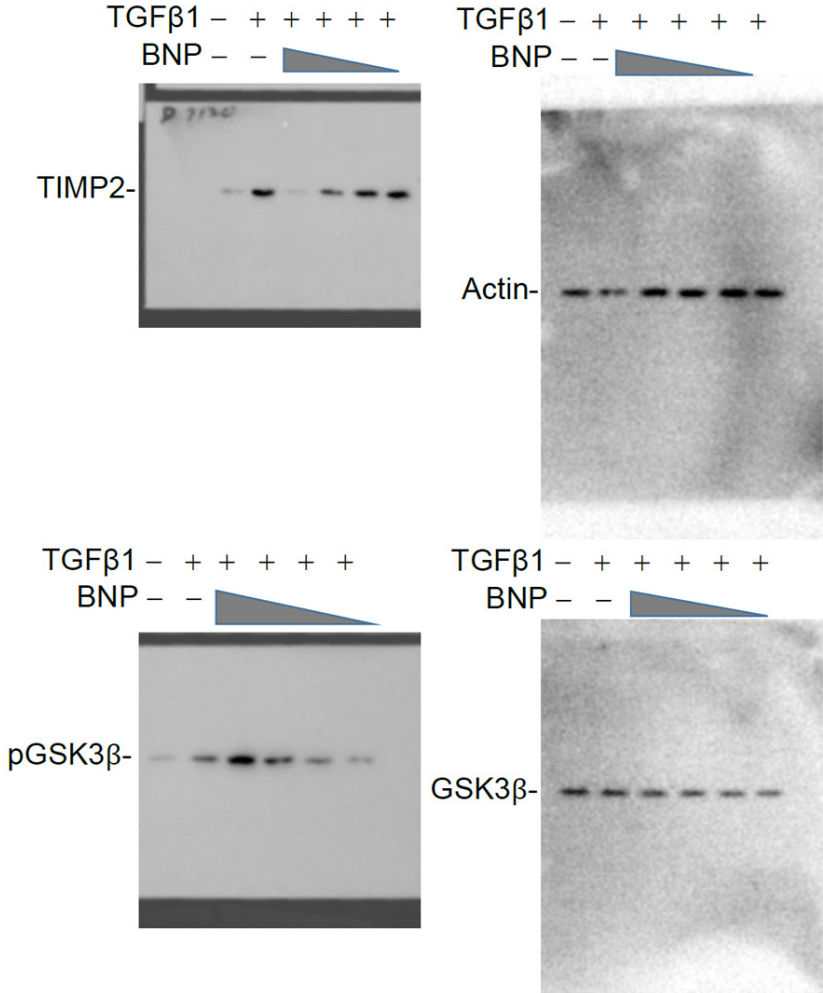

Figure S1. Uncropped blots used for the construction of composite of Figure 2A.

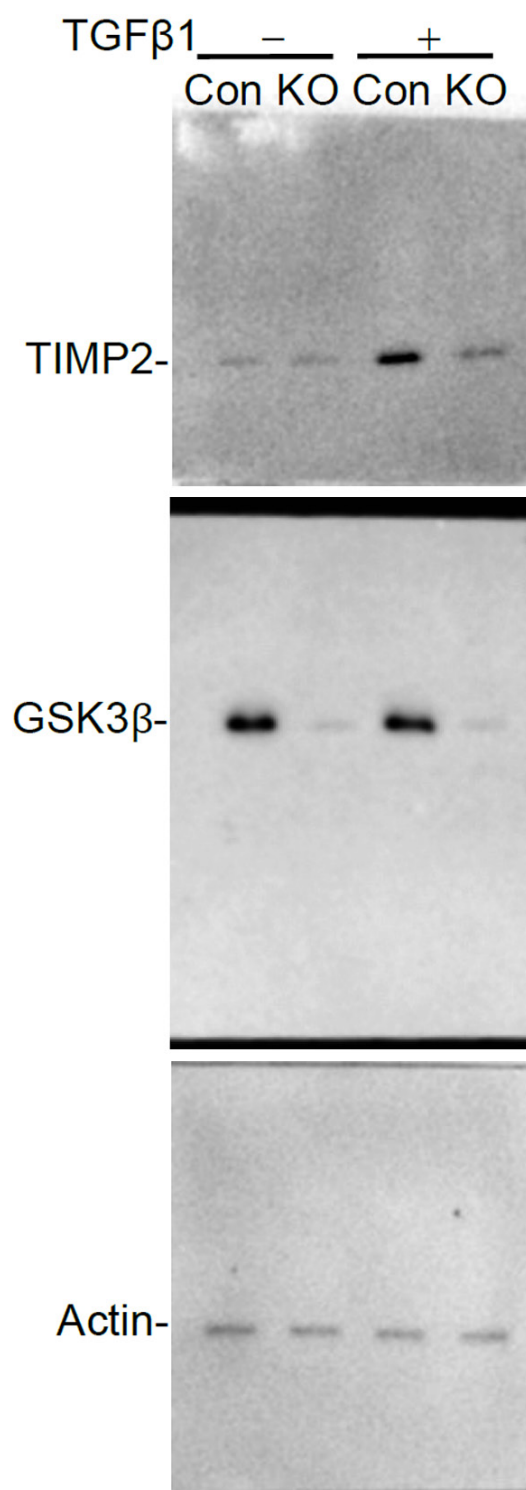

Figure S2. Uncropped blots used for the construction of composite of Figure 4A.

BNP mitigates podocyte ECM accumulation via GSK3 $\beta$  inhibition

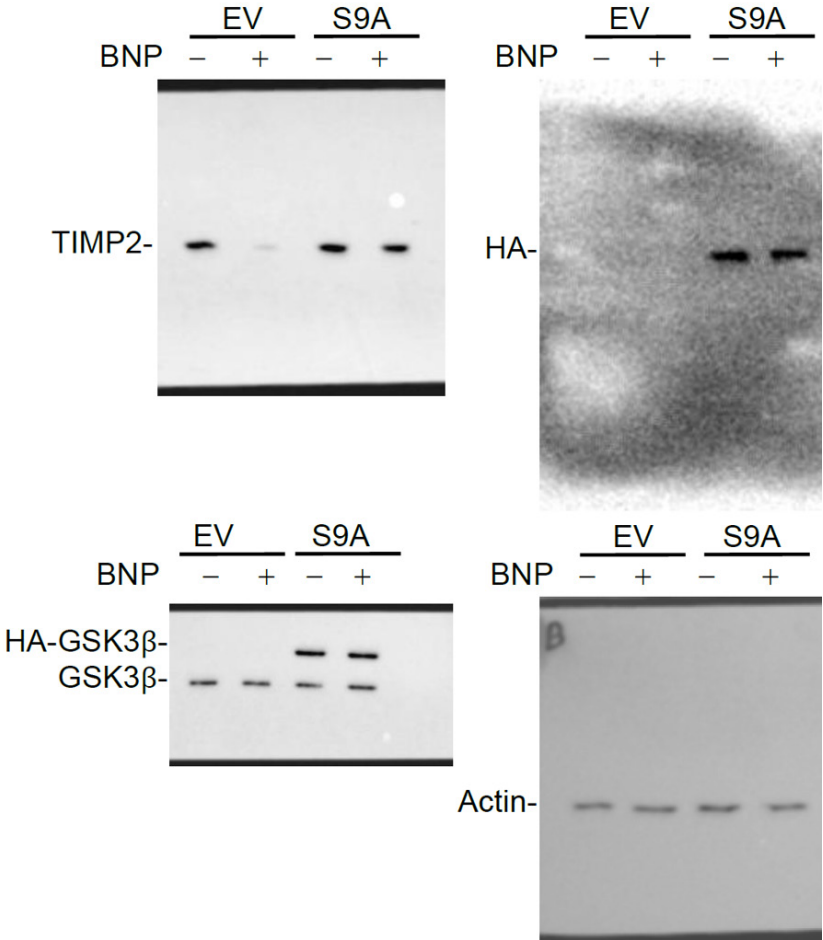

Figure S3. Uncropped blots used for the construction of composite of Figure 5A.
